# Supplementary material for: Boosting output performance of sliding mode triboelectric nanogenerator by charge space-accumulation effect
Source: PubMed Central journal article supplement (PMC7450049; doi:10.1038/s41467-020-18086-4), 2020-08-26
Supplement: 41467_2020_18086_MOESM3_ESM.pdf [file 41467_2020_18086_MOESM3_ESM.pdf]

### **Description of Additional Supplementary Files**

File Name: Supplementary Movie 1

Description: Both shielding electrode and extra blank-tribo-area are necessary for CSA-S-TENG.

File Name: Supplementary Movie 2

Description: Demonstration of the stepwise charging voltage of 1 $\mu$ F capacitor.

File Name: Supplementary Movie 3

Description: 912 green LEDs are powered by R-CSA-S-TENG

File Name: Supplementary Movie 4

Description: A digital scientific calculator is powered by R-CSA-S-TENG.

File Name: Supplementary Movie 5

Description: A commercial multifunctional thermo-hygrometer is powered by R-CSA-S-TENG.
